# Supplementary material for: A Fully Photometric Approach to Type Ia Supernova Cosmology in the LSST Era: Host Galaxy Redshifts and Supernova Classification
Source: Research Square preprint supplement (doi:10.21203/rs.3.rs-8316453/v1), 2025-12-24
Supplement: Supplementary file 3 [file DIA.pdf › Plot/DIA.pdf]

# Cosmology Analysis

**Stage 1**  
**Simulations**  
(including for  
BBC)

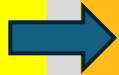

**Stage 2**  
Standardized  
SN Brightness  
with **photo-z**  
**LC Fit**

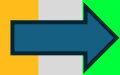

**Stage 3**  
SCONE:  
Photometric  
**Classifier**

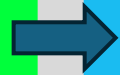

**Stage 4**  
BBC and  
Hubble  
Diagram

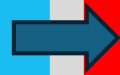

**Stage 5**  
**Cosmology**  
Fitting
