# Supplementary figures and images for: A Fully Photometric Approach to Type Ia Supernova Cosmology in the LSST Era: Host Galaxy Redshifts and Supernova Classification
Source: Research Square preprint supplement (doi:10.21203/rs.3.rs-8316453/v1), 2025-12-24

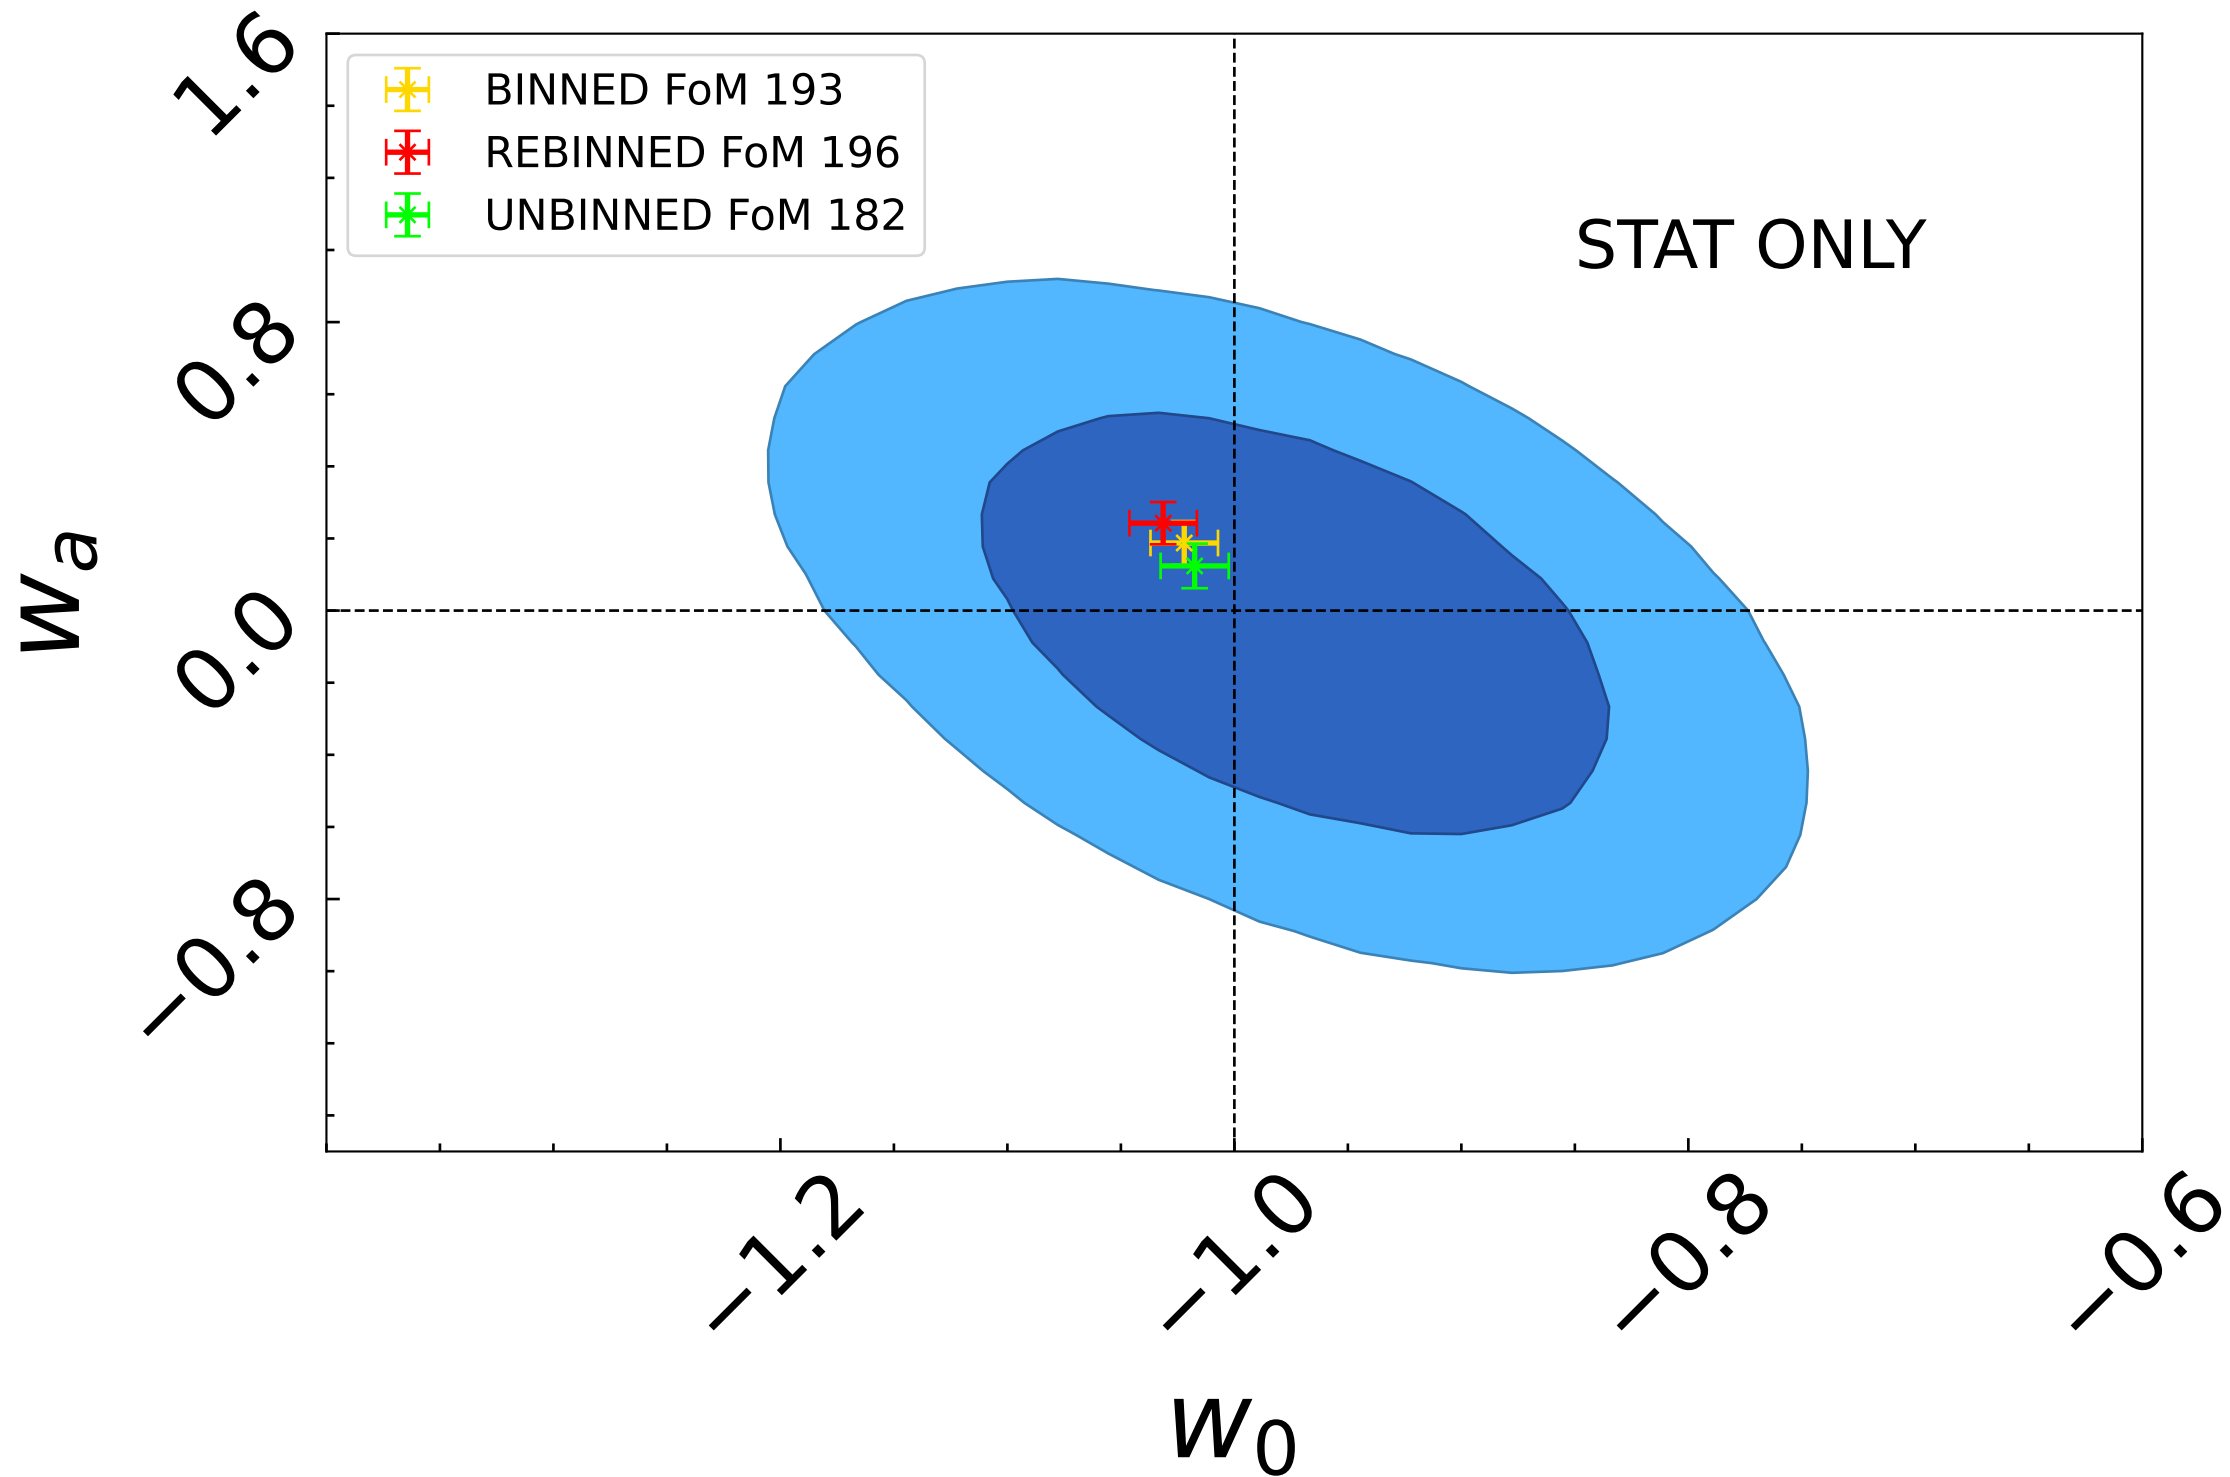

Supplement: Supplementary file 1 [file DE_Ellipse-stat_only.pdf › Plot/DE_Ellipse-stat_only.pdf]

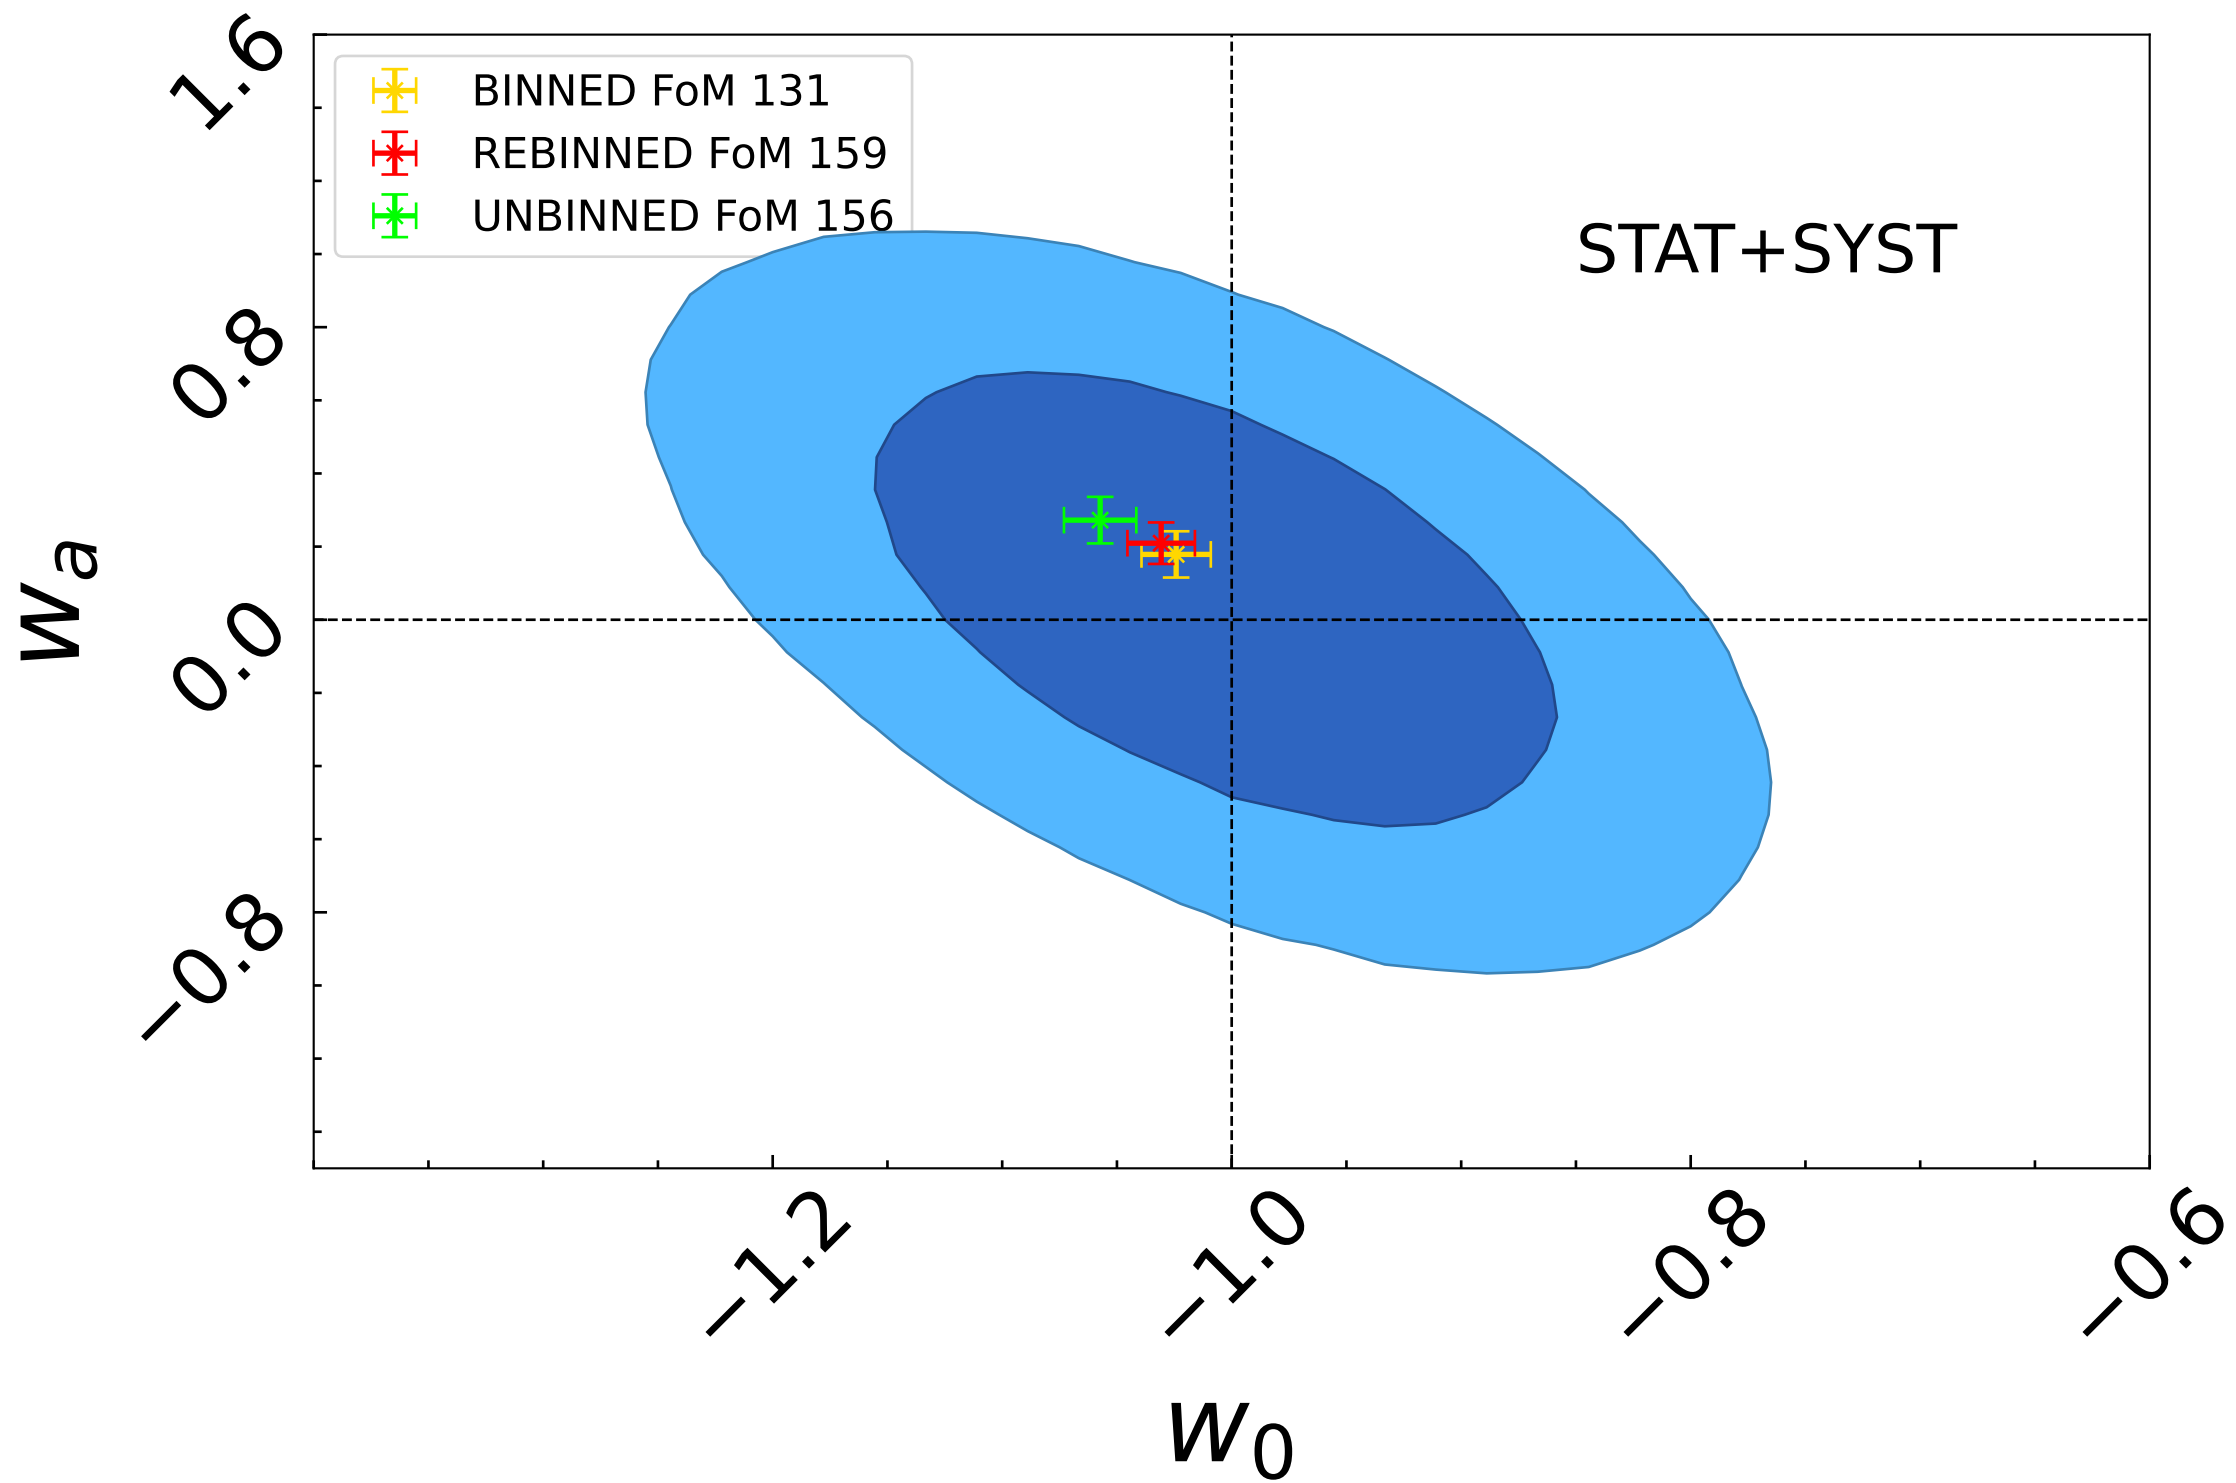

Supplement: Supplementary file 2 [file DE_Ellipse-syst_unbin.pdf › Plot/DE_Ellipse-syst_unbin.pdf]

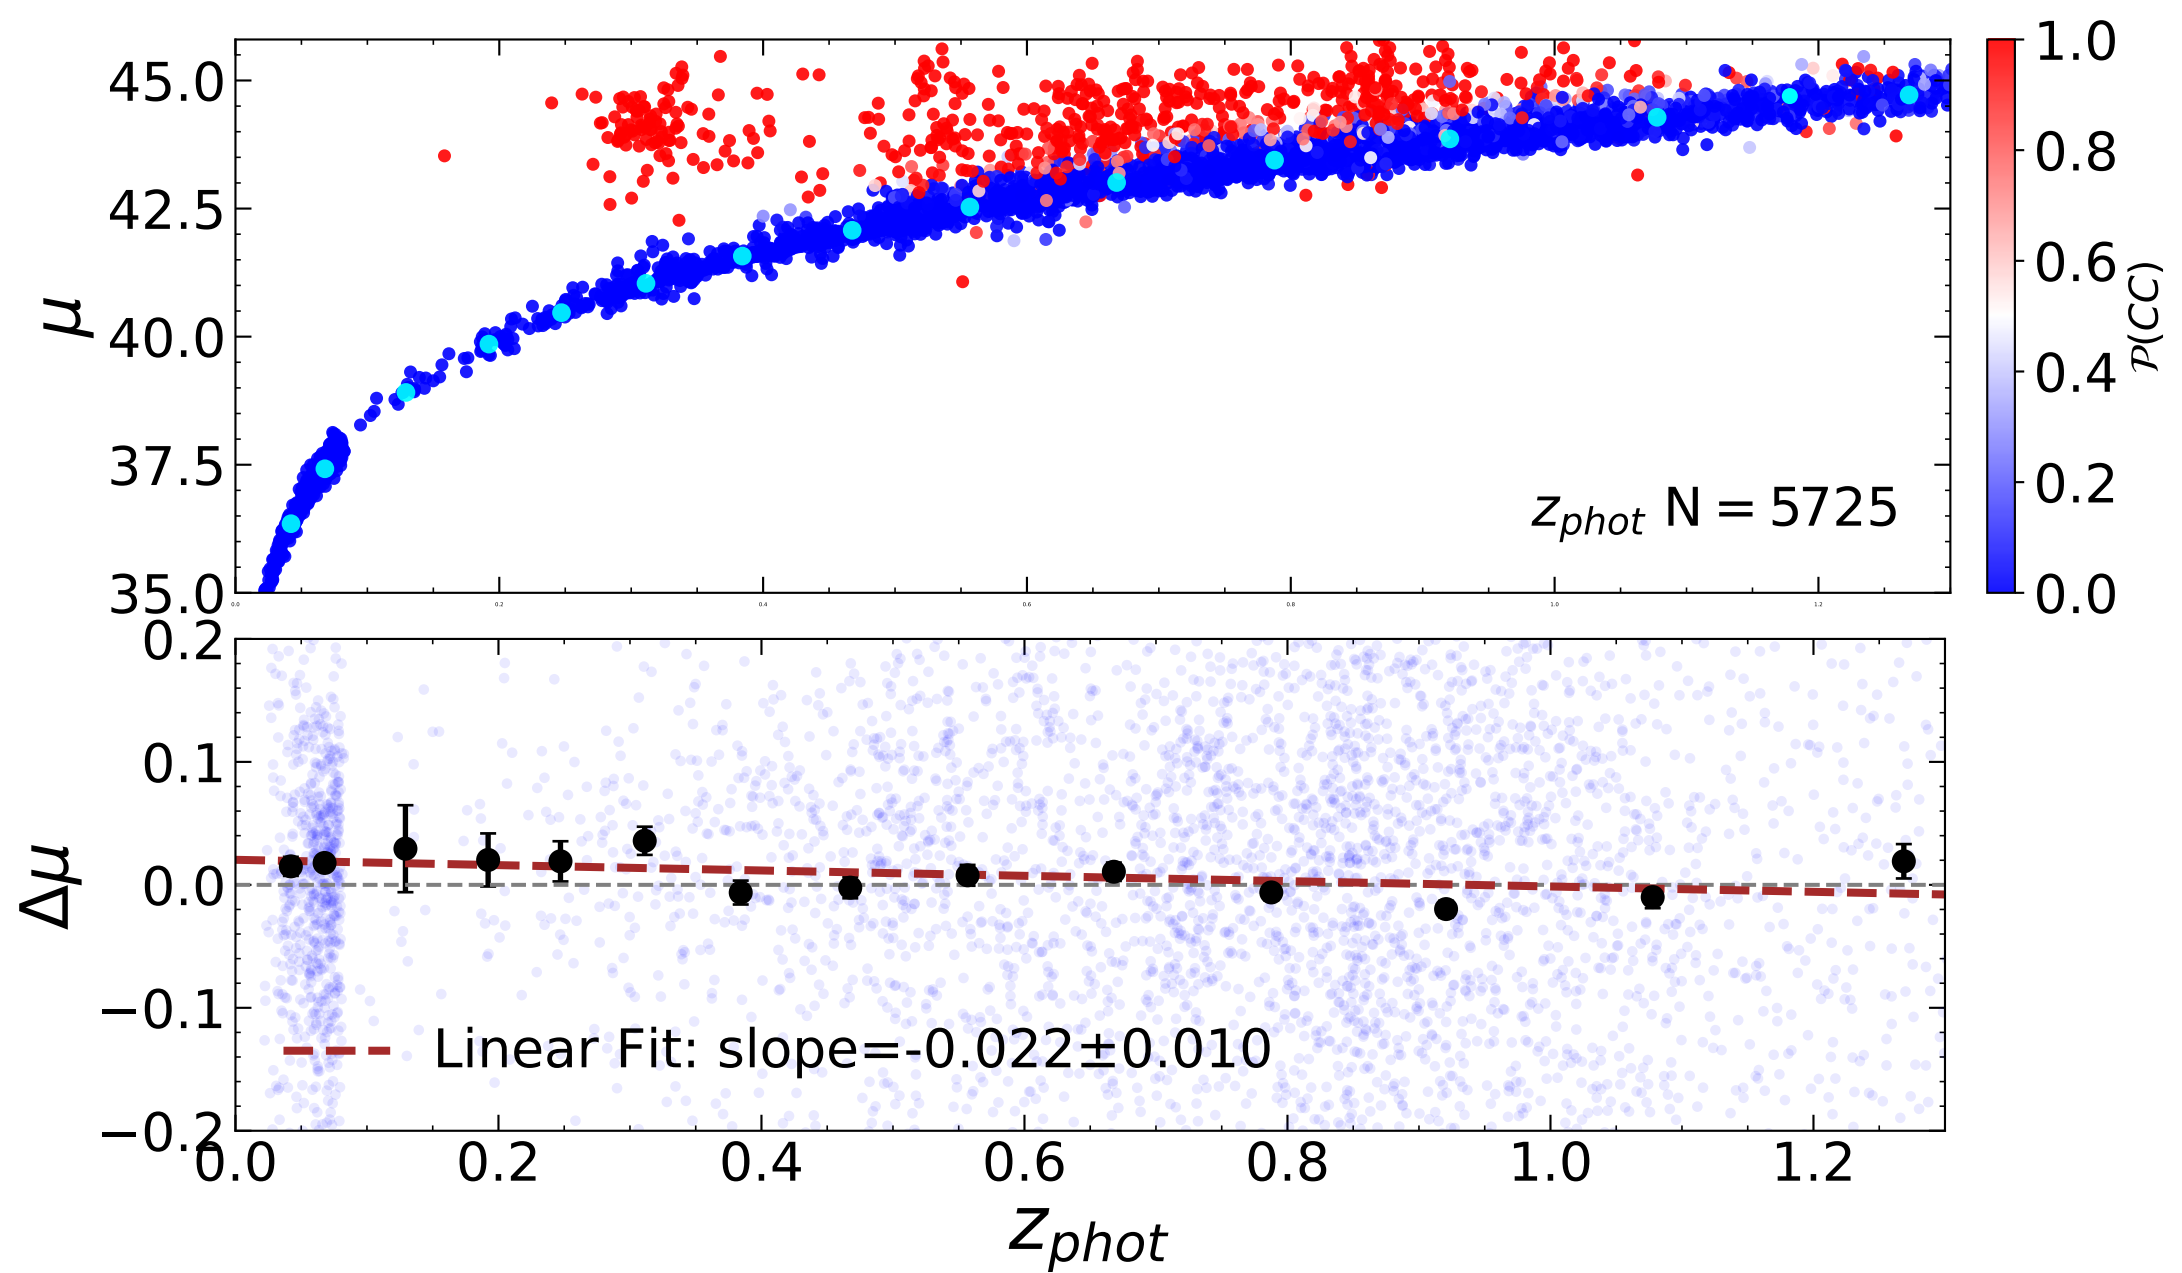

Supplement: Supplementary file 4 [file HD_phot.pdf › Plot/HD_phot.pdf]

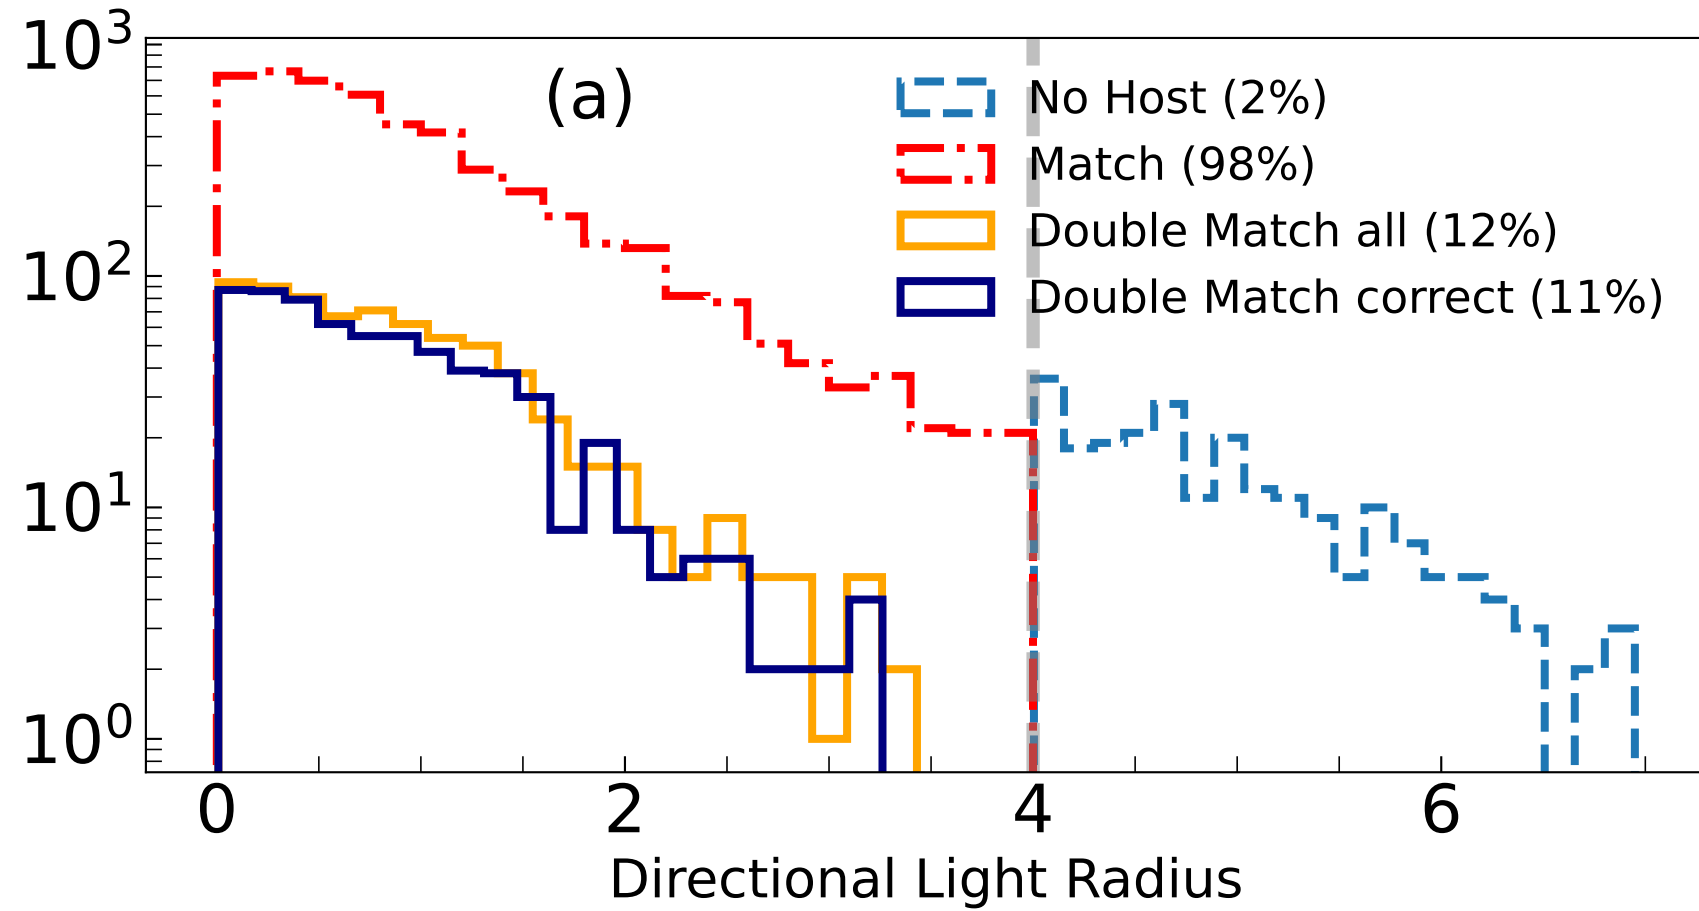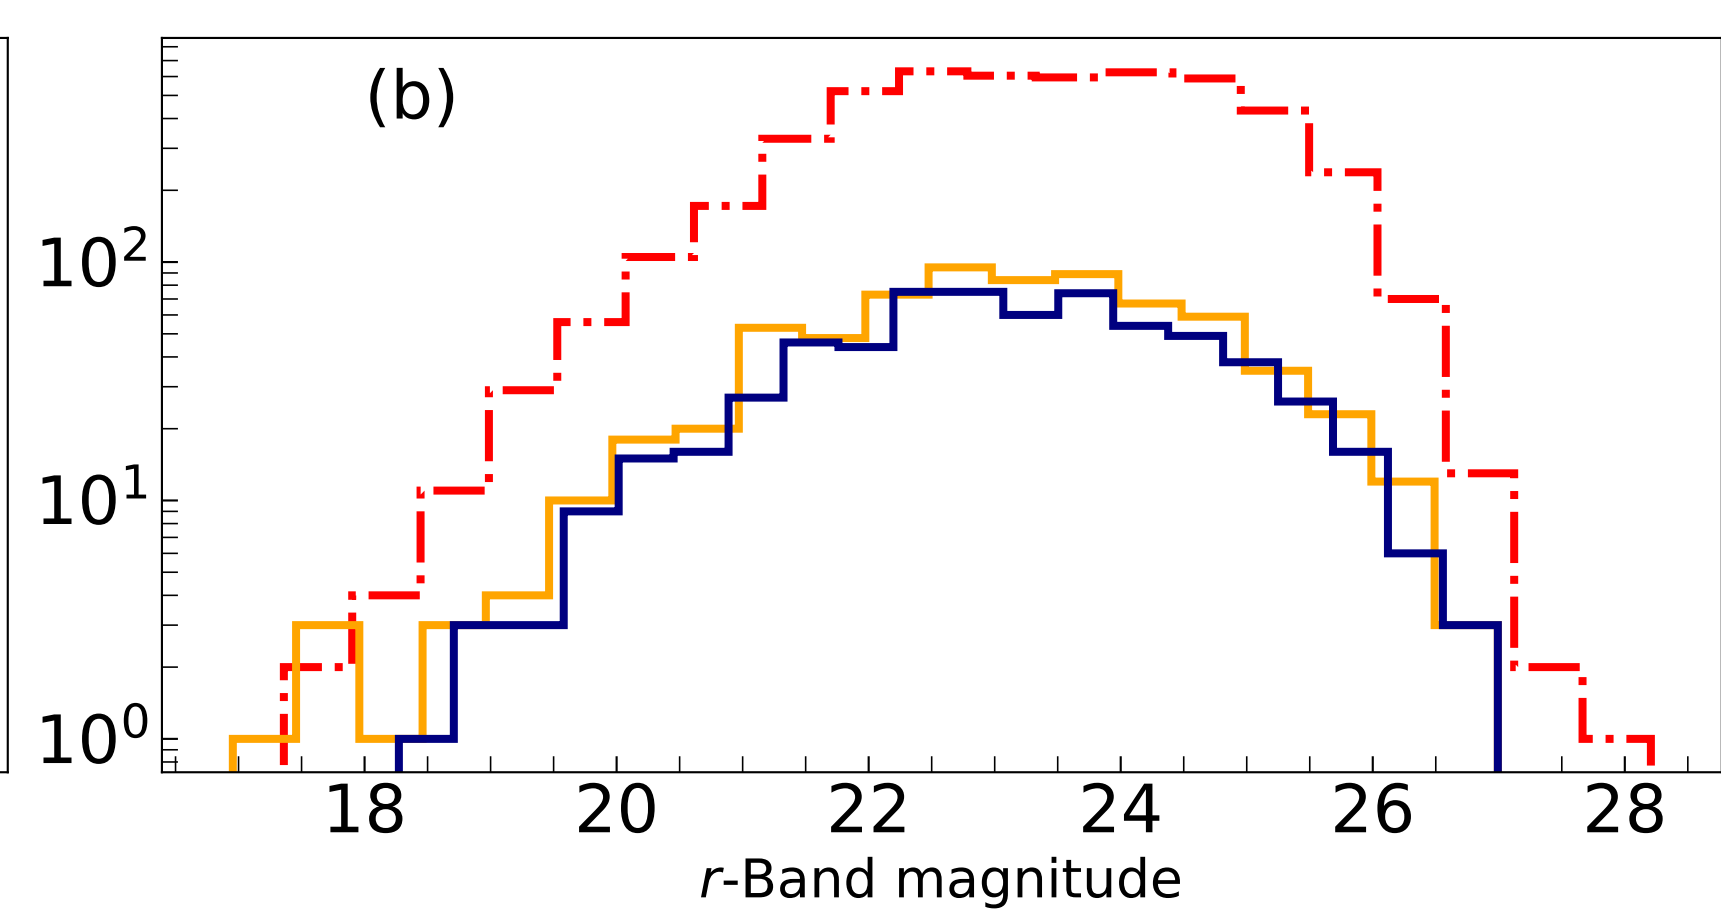

Supplement: Supplementary file 5 [file Host-Mis.pdf › Plot/Host-Mis.pdf]

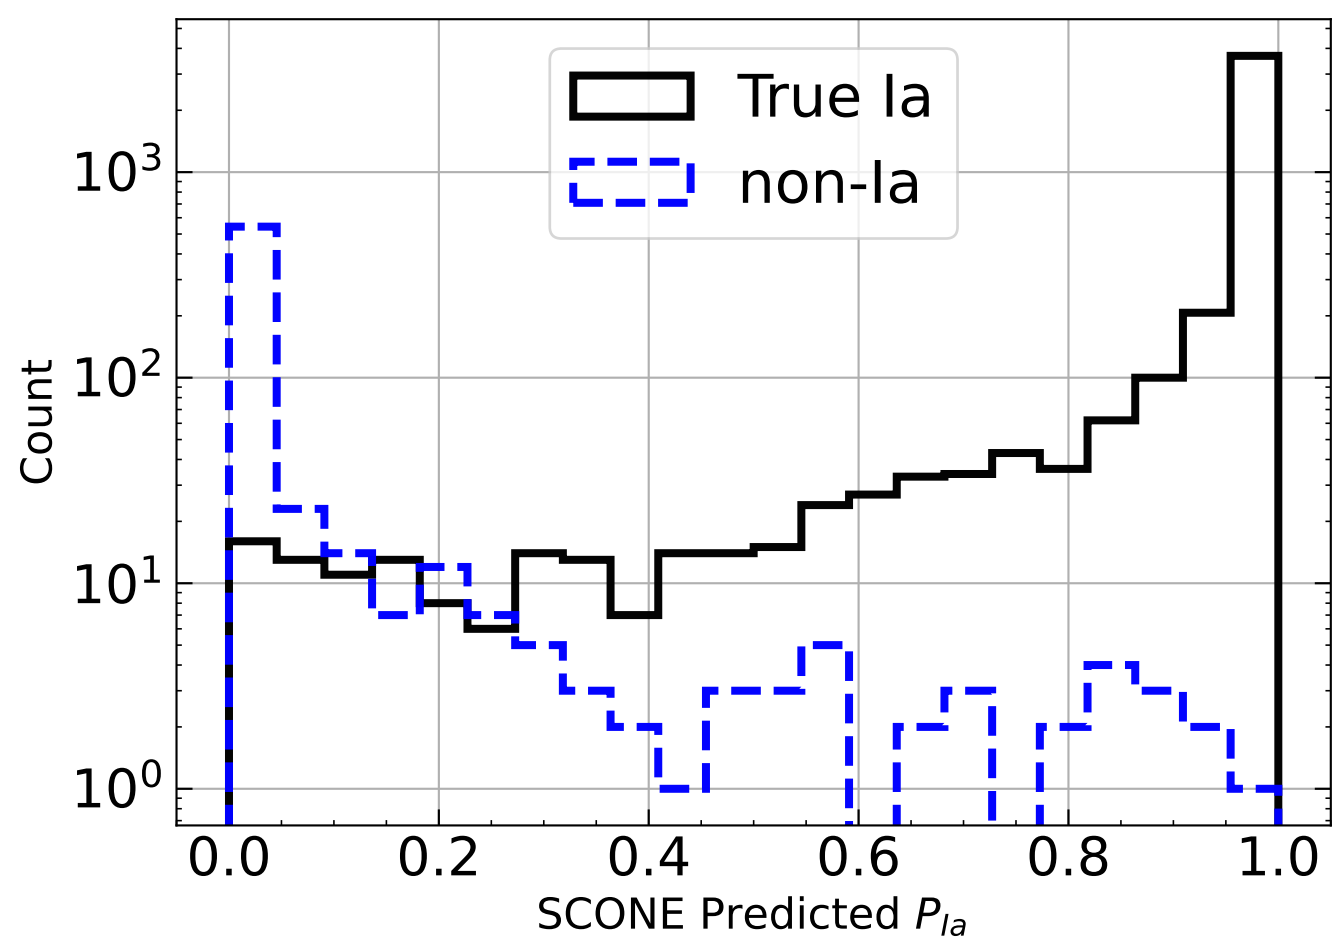

Supplement: Supplementary file 6 [file SCONE_PRED.pdf › Plot/SCONE_PRED.pdf]

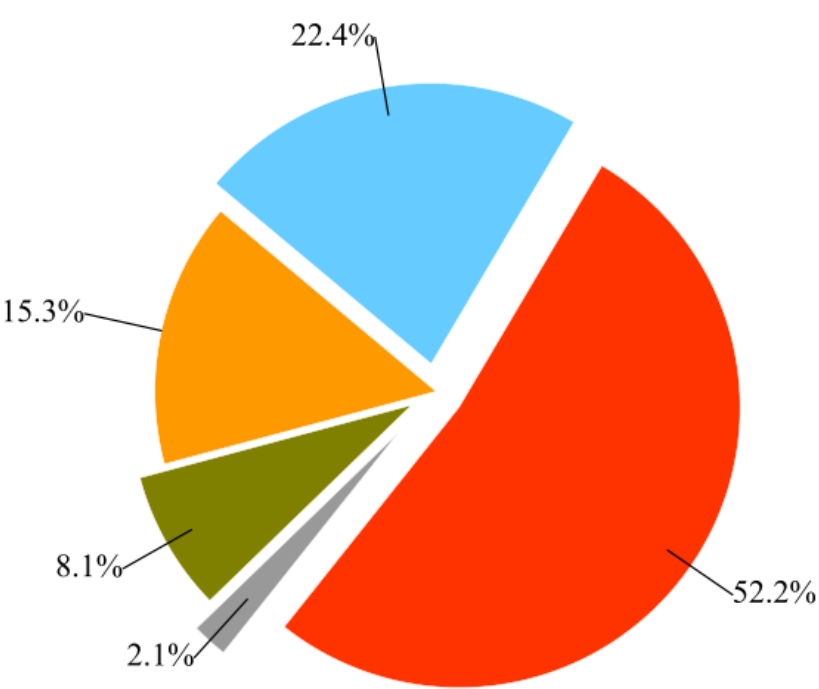

(a) Ngen total

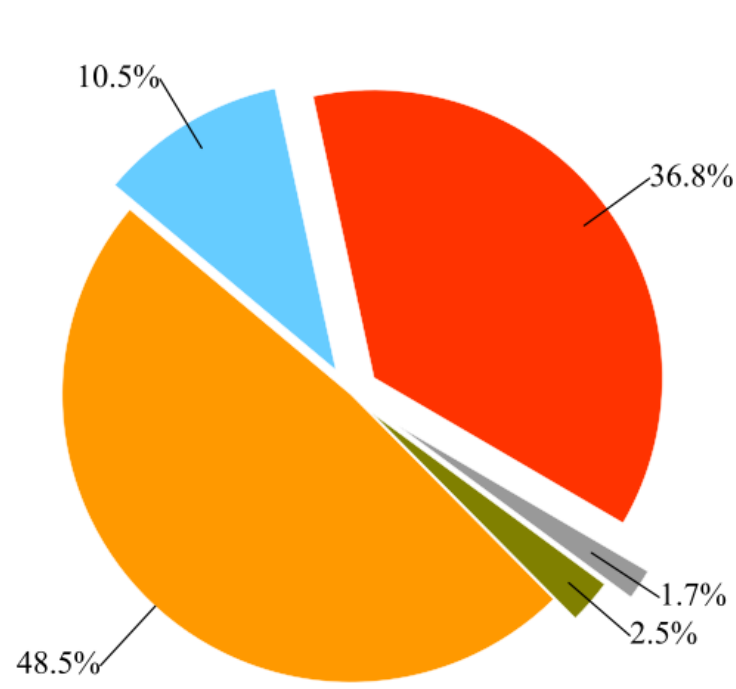

(b) Ngen trigger

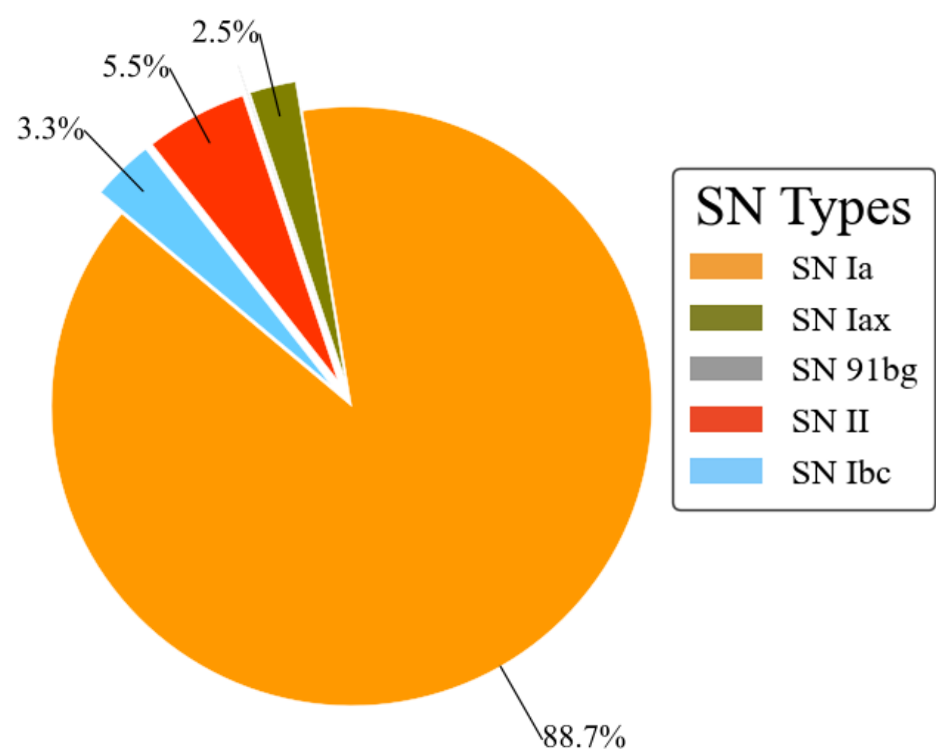

(c) Final sample

Supplement: Supplementary file 7 [file SN_piechart_final.pdf › Plot/SN_piechart_final.pdf]

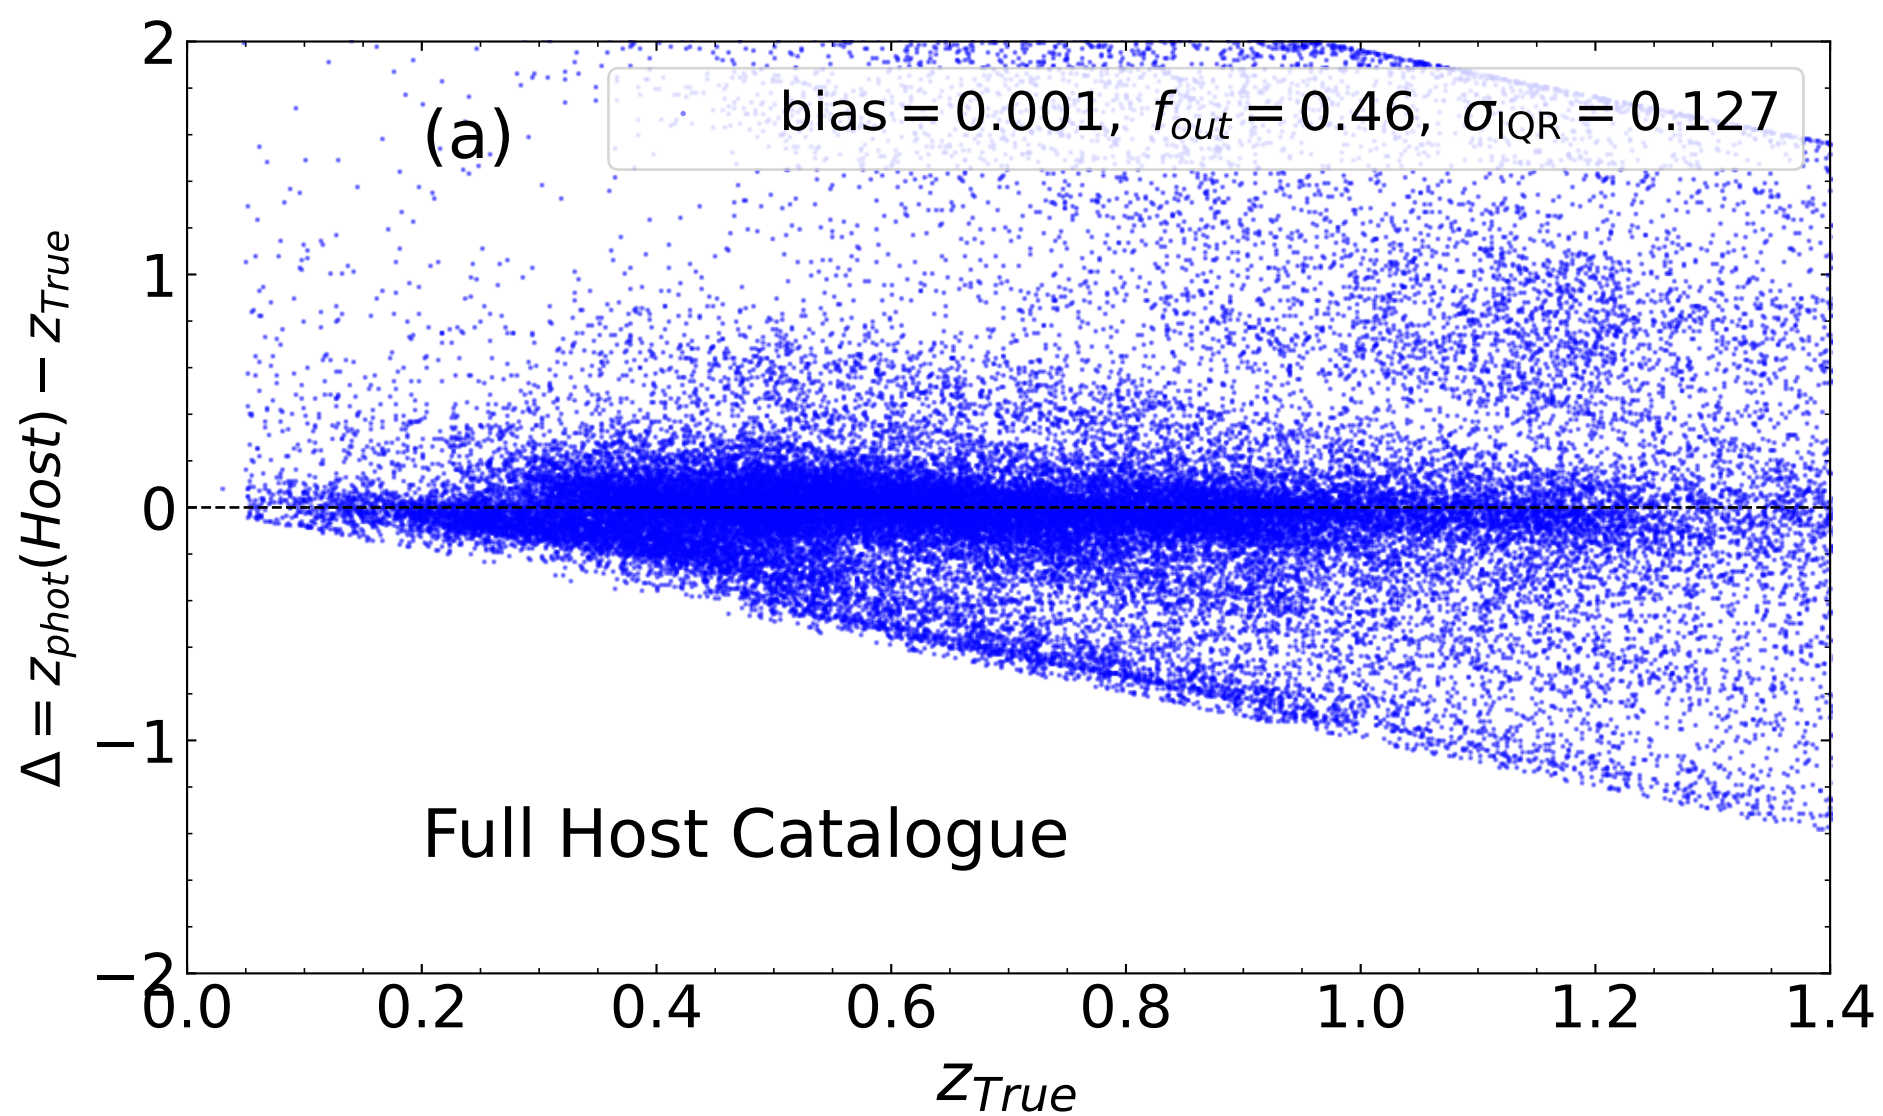

Supplement: Supplementary file 8 [file photoz1_all.pdf › Plot/photoz1_all.pdf]

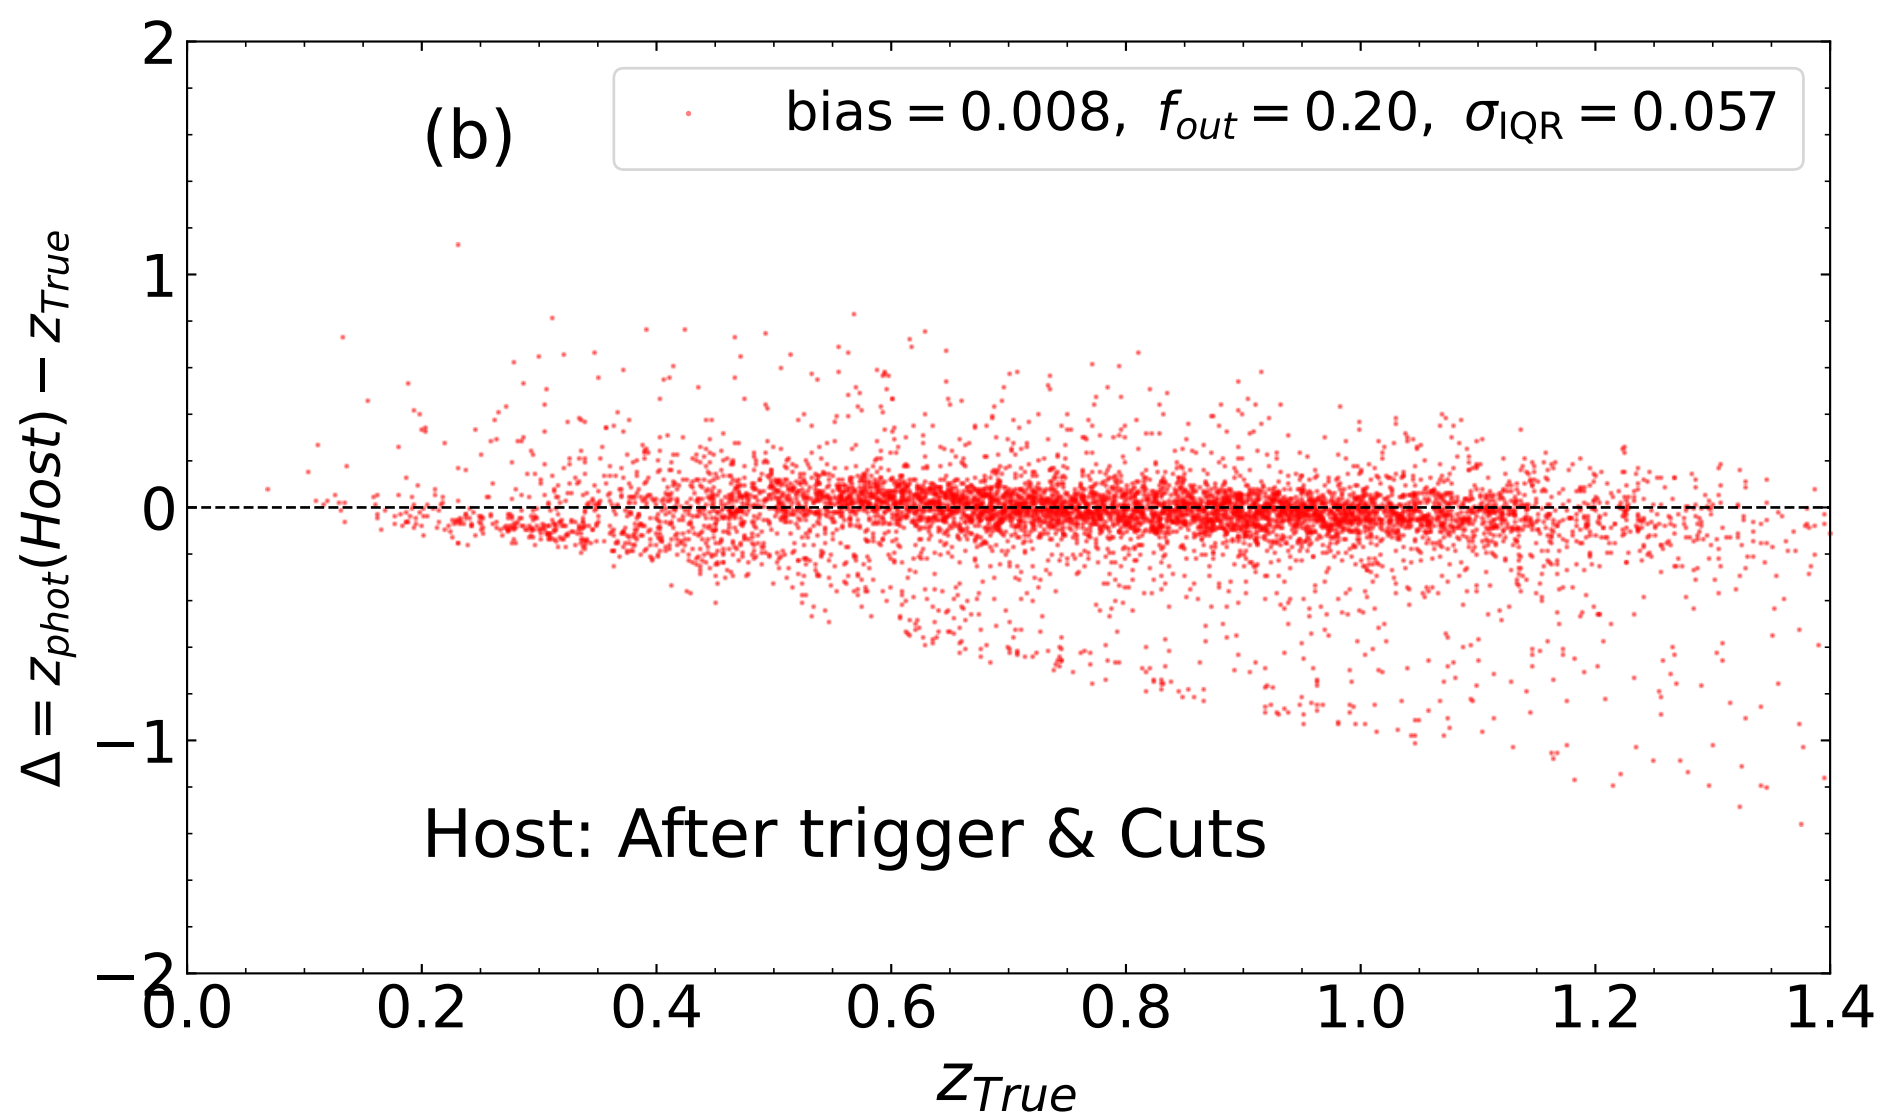

Supplement: Supplementary file 9 [file photoz2.pdf › Plot/photoz2.pdf]

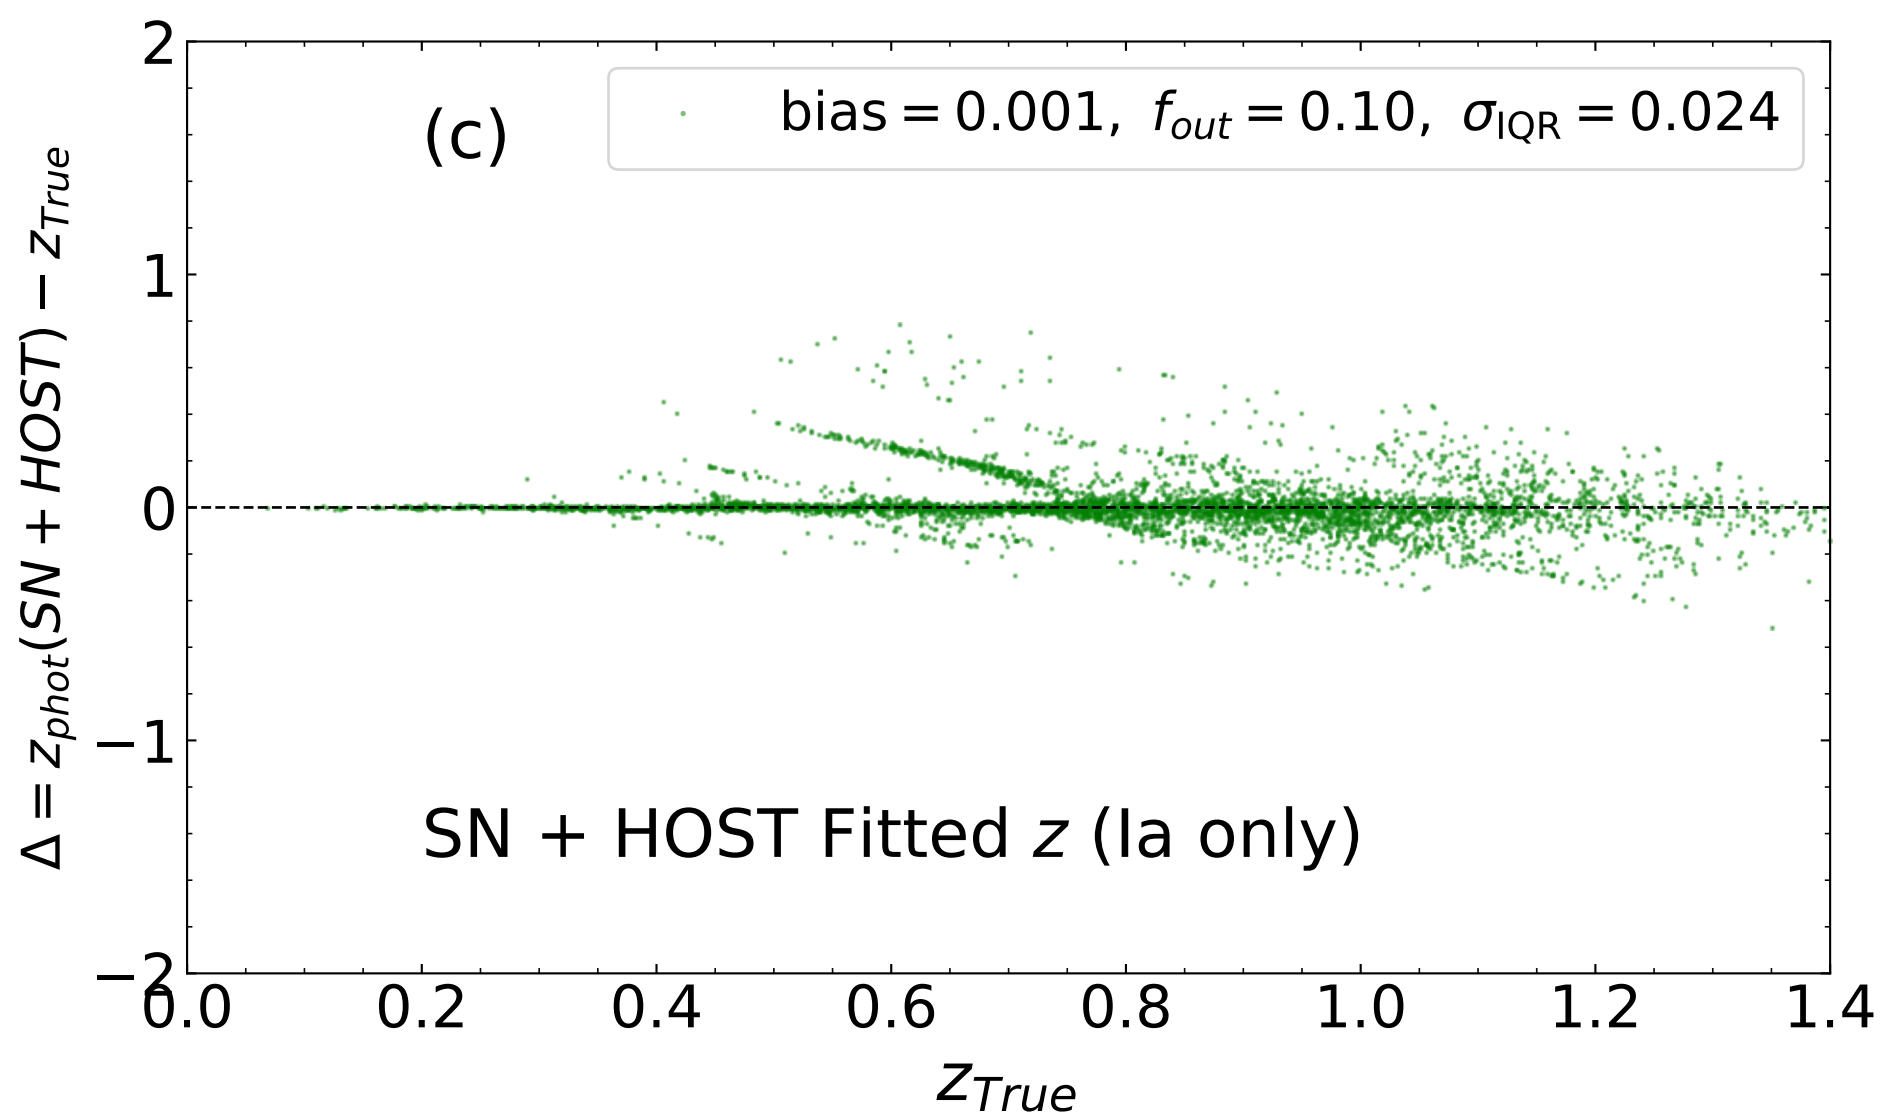

Supplement: Supplementary file 10 [file photoz_SNplusHOST_IaOnly.pdf › Plot/photoz_SNplusHOST_IaOnly.pdf]

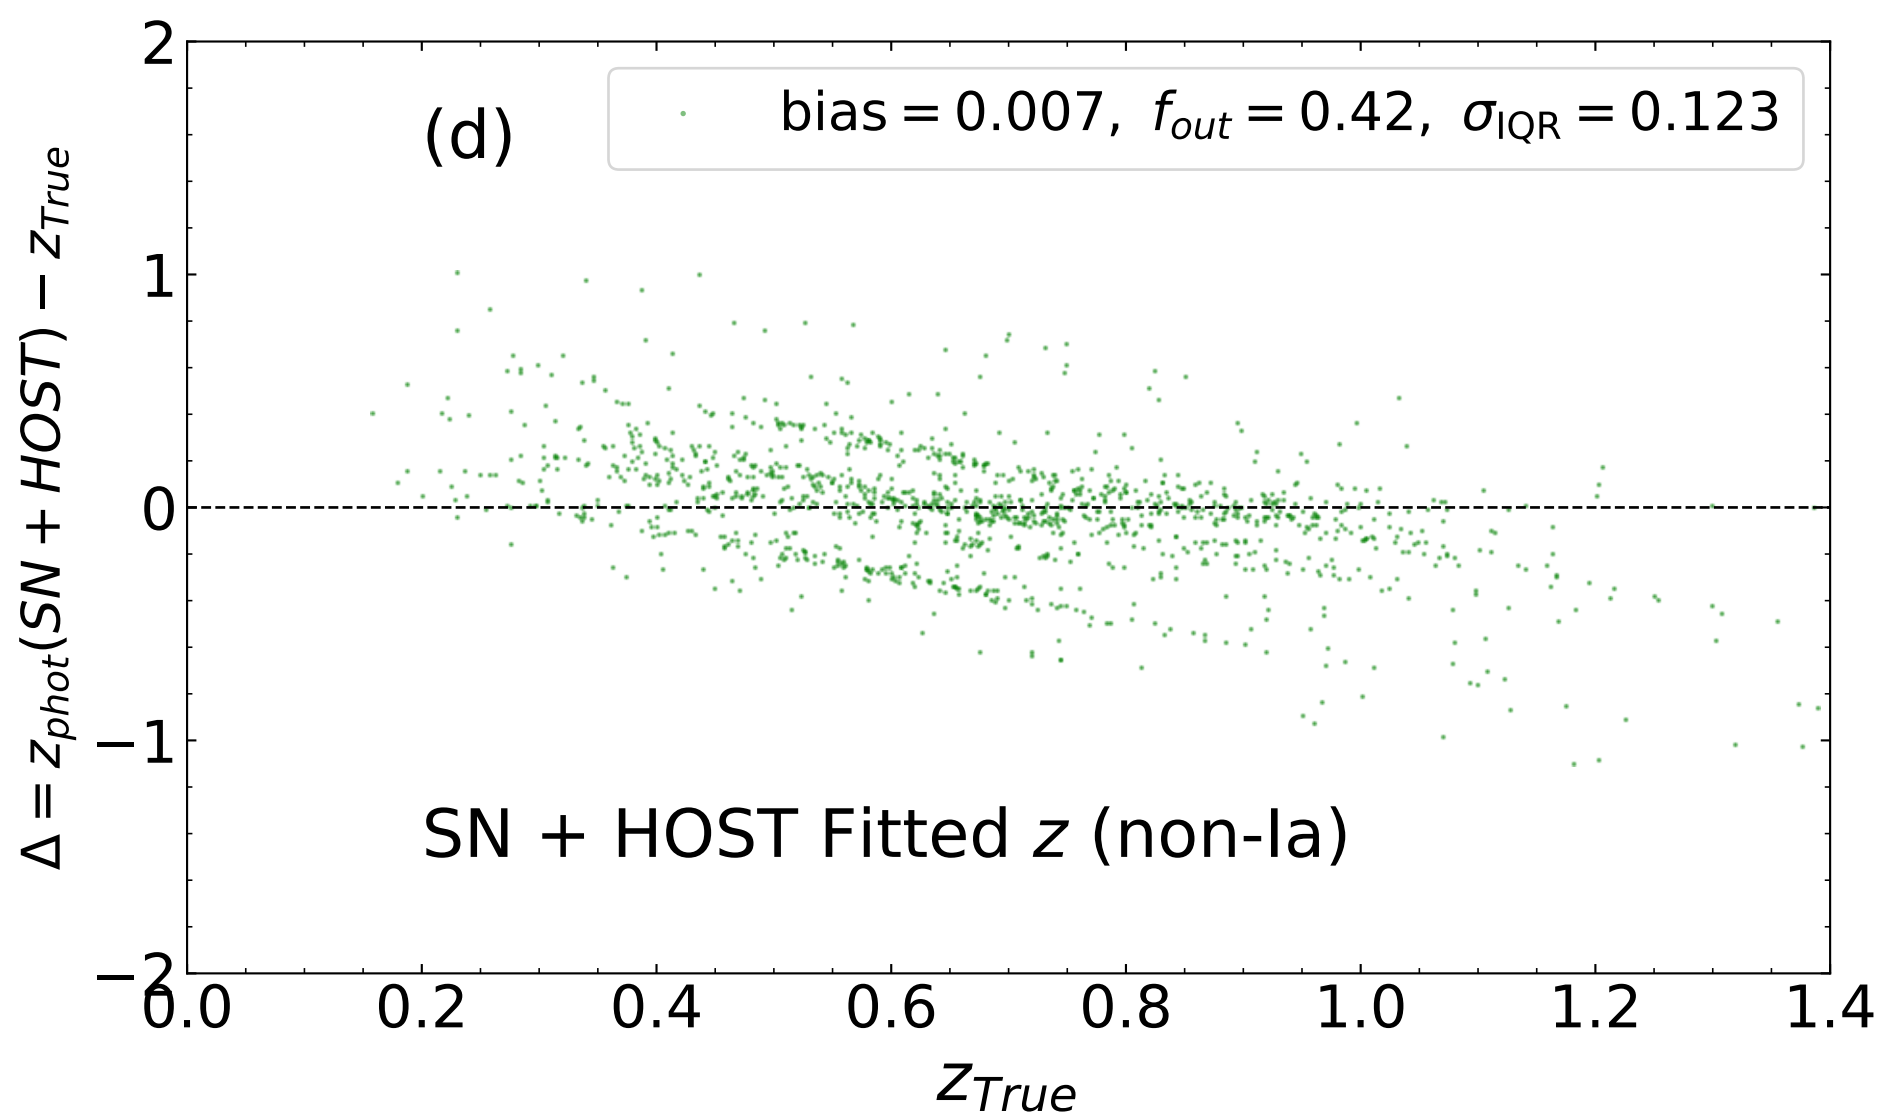

Supplement: Supplementary file 11 [file photoz_SNplusHOST_non-Ia.pdf › Plot/photoz_SNplusHOST_non-Ia.pdf]

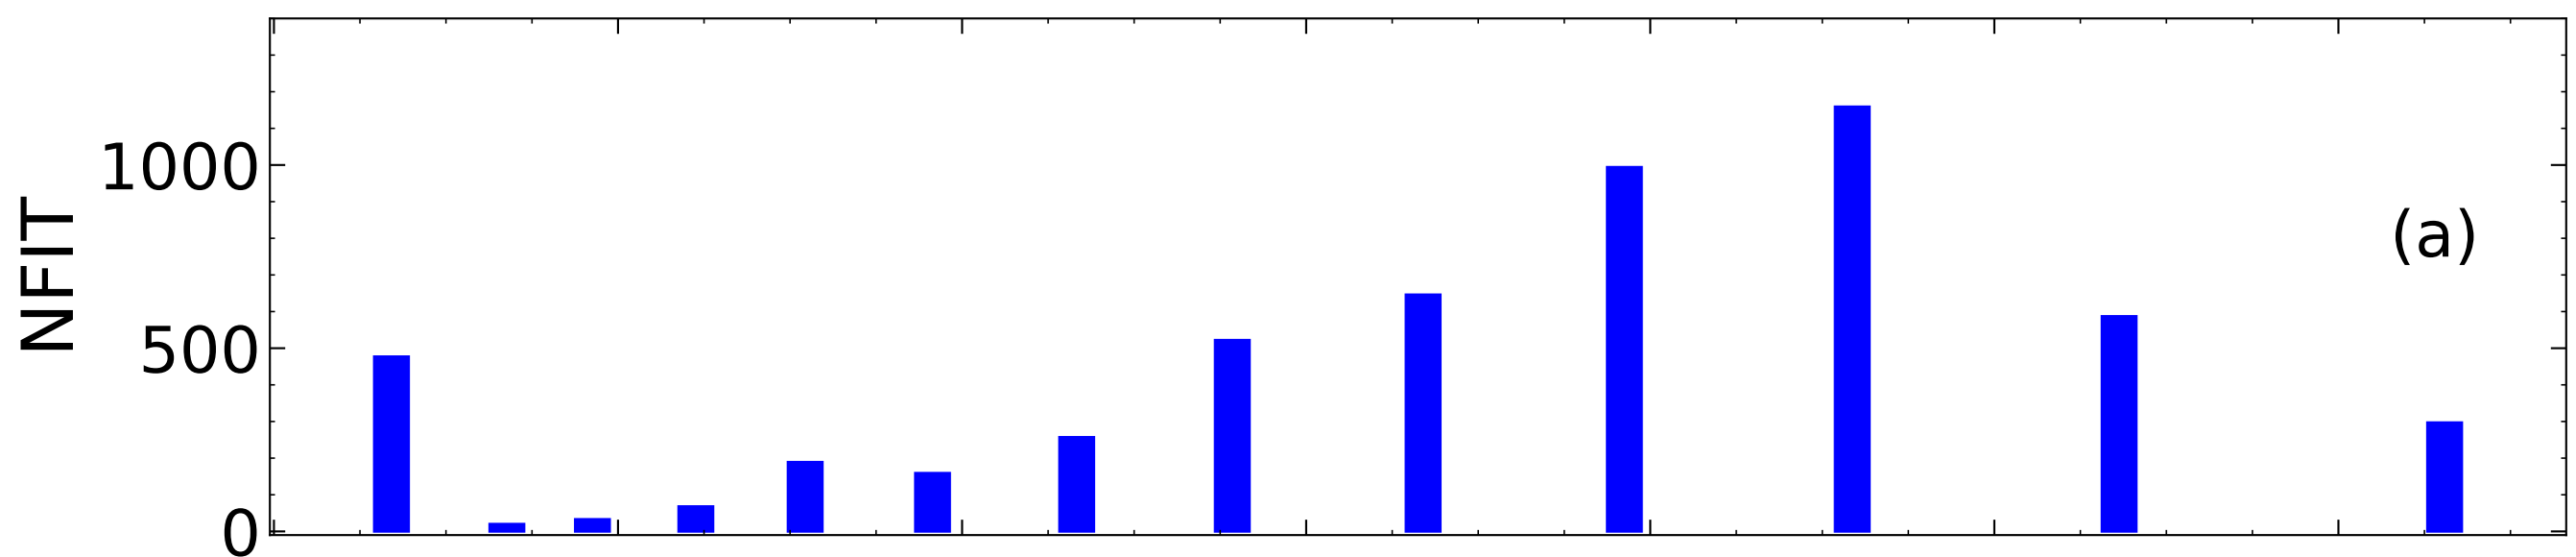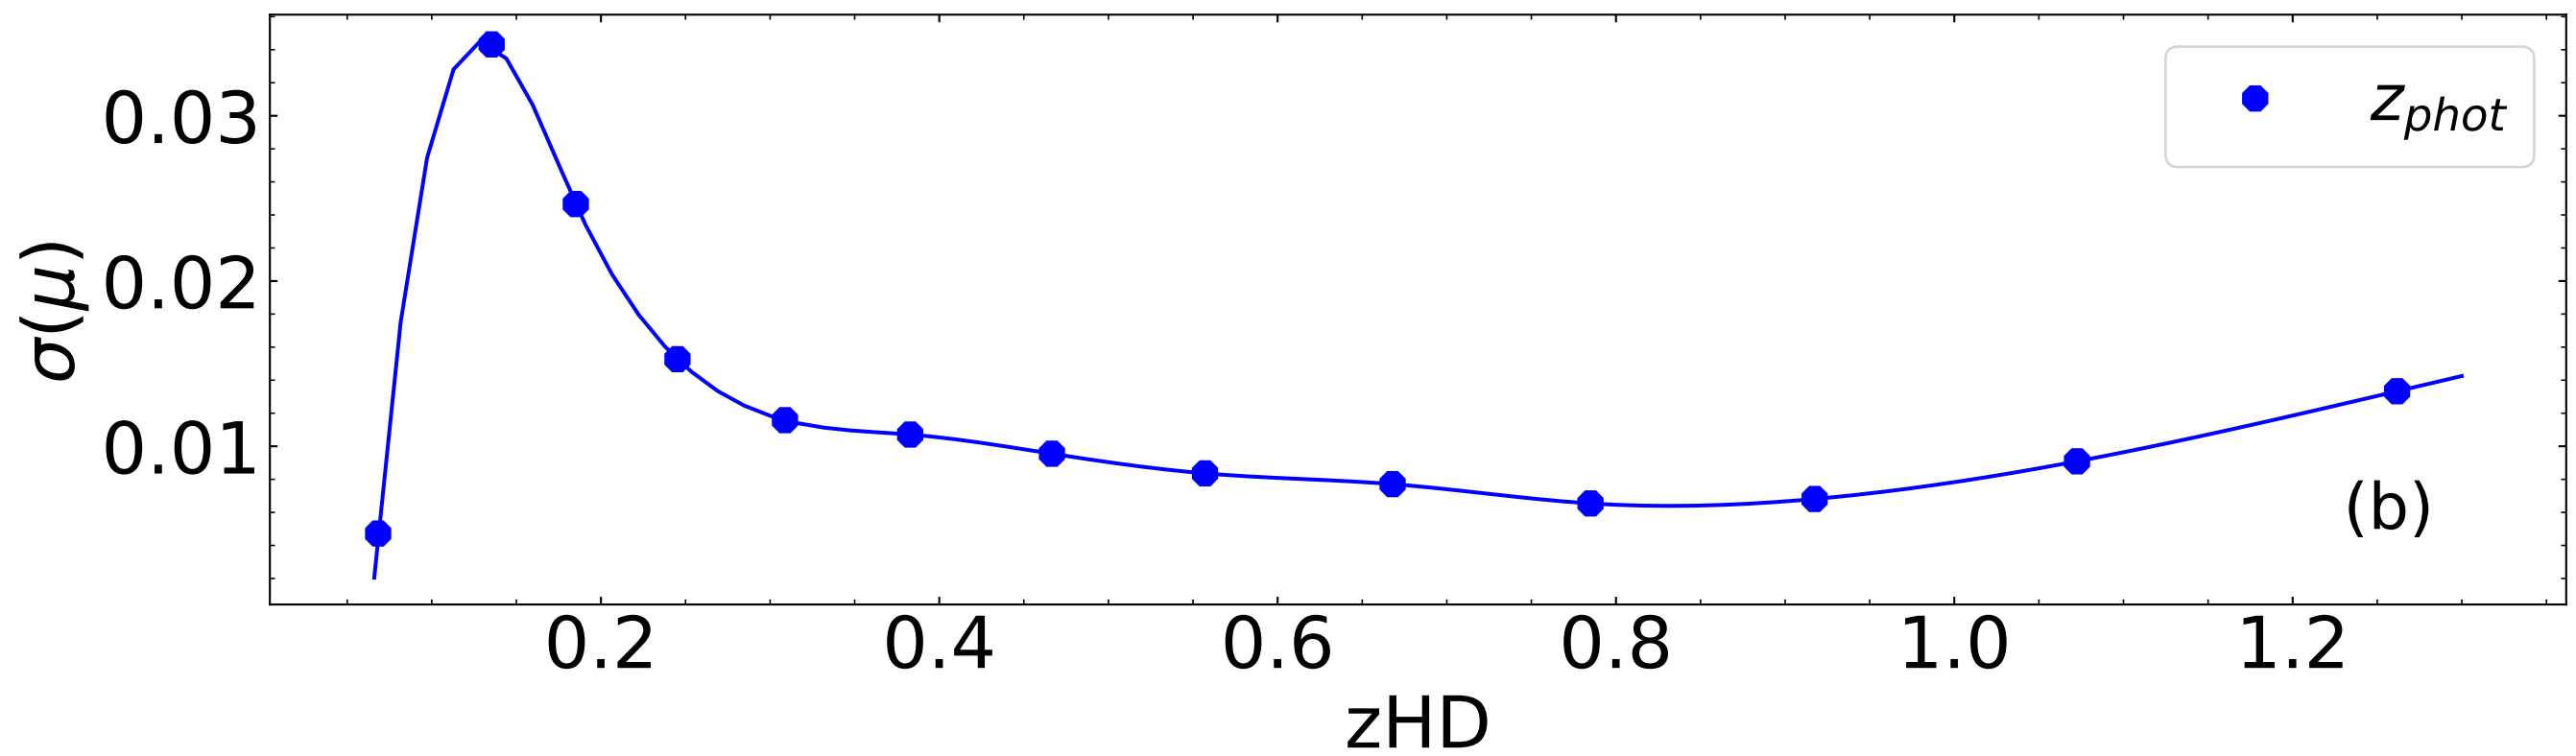

Supplement: Supplementary file 12 [file sig_Mu_Compare_cc.pdf › Plot/sig_Mu_Compare_cc.pdf]

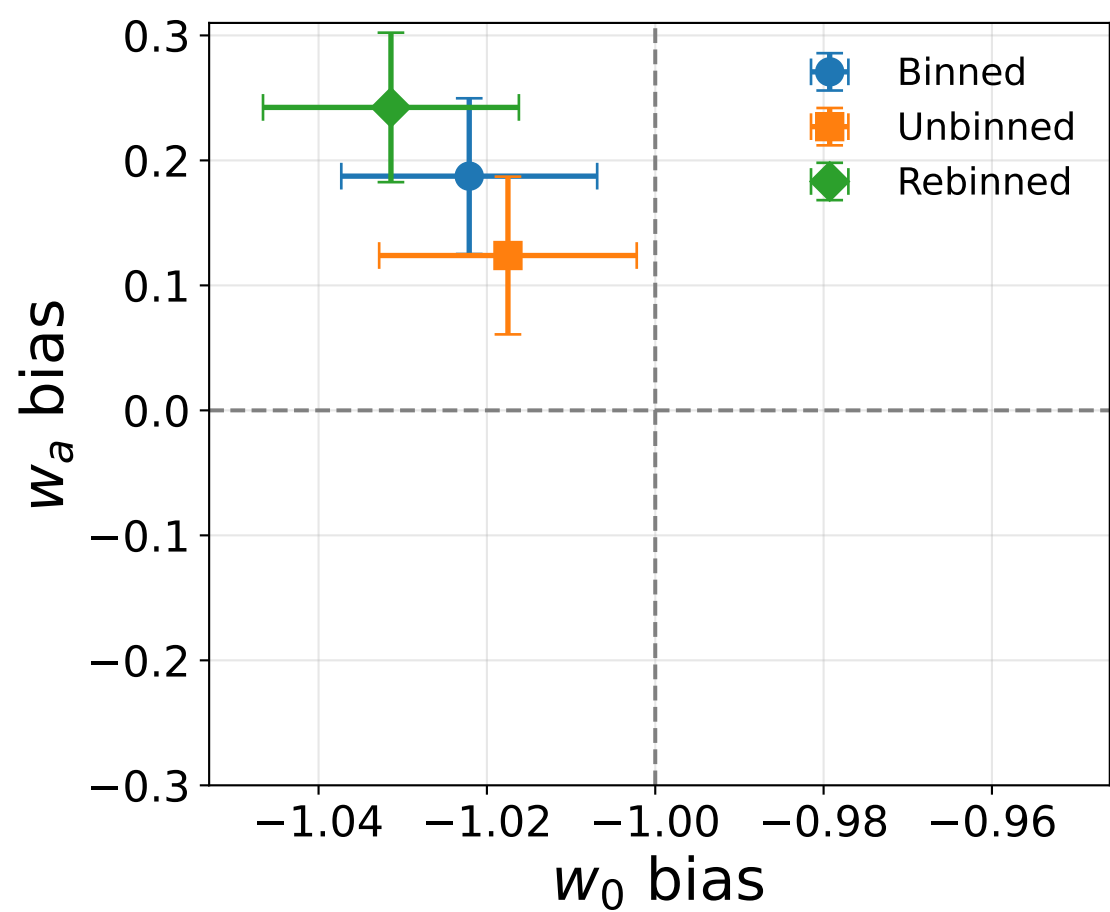

Supplement: Supplementary file 13 [file w0wa_bias_single.pdf › Plot/w0wa_bias_single.pdf]

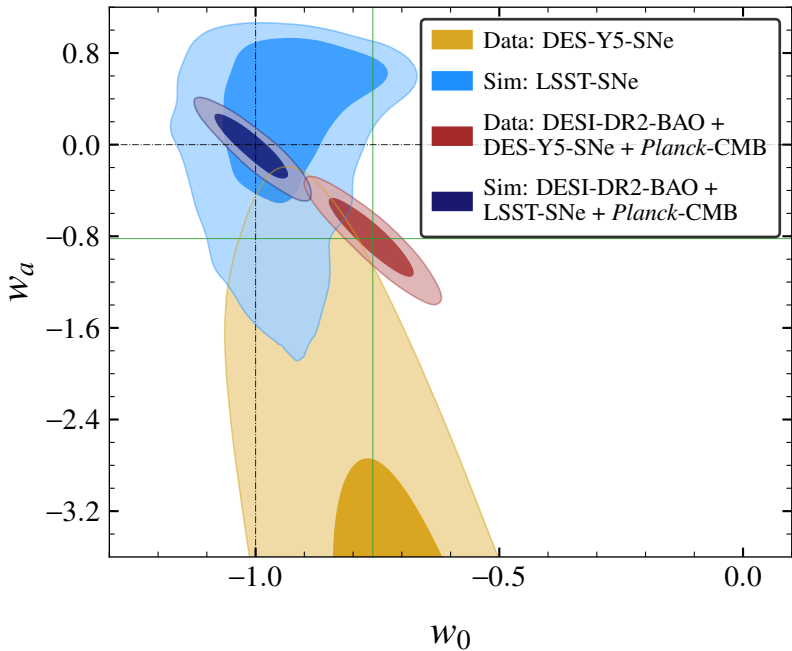

Supplement: Supplementary file 14 [file w0wa_desi_des_planck_lsst_data_mock.pdf › Plot/w0wa_desi_des_planck_lsst_data_mock.pdf]

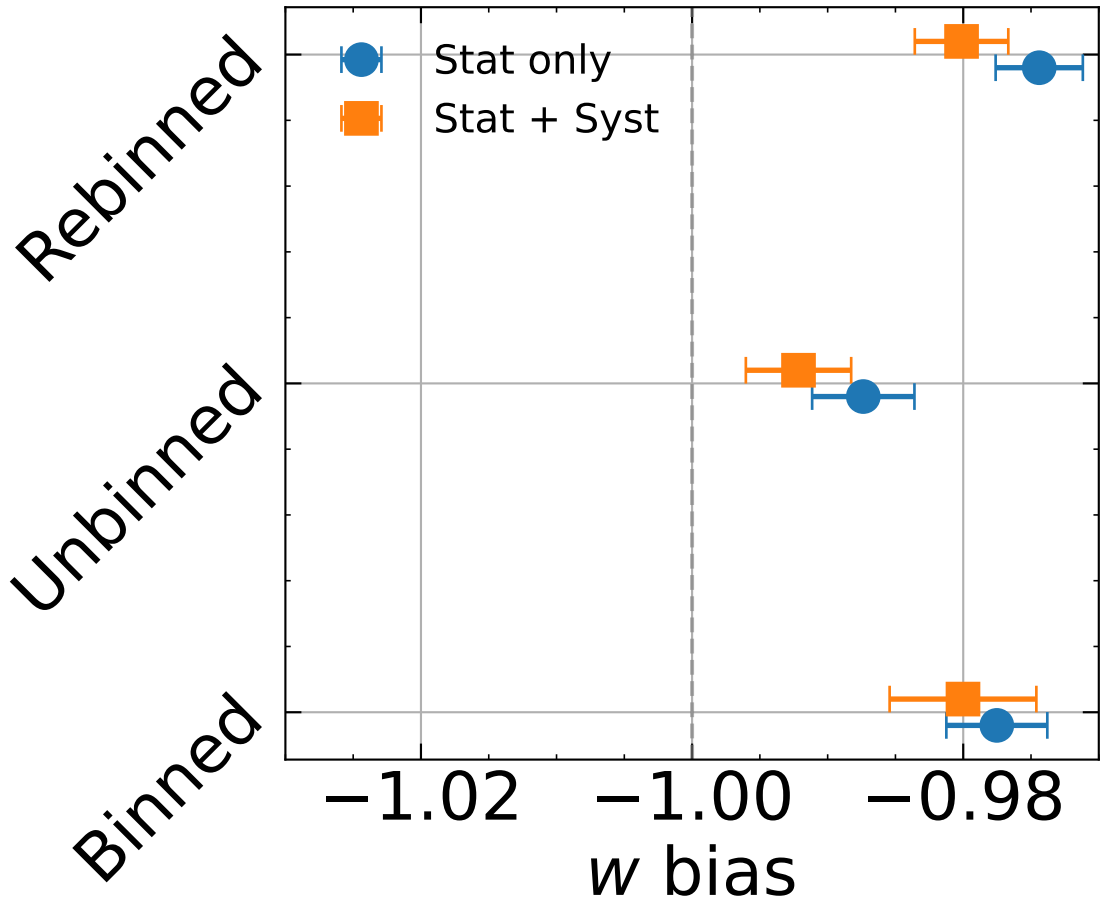

Supplement: Supplementary file 15 [file w_bias.pdf › Plot/w_bias.pdf]

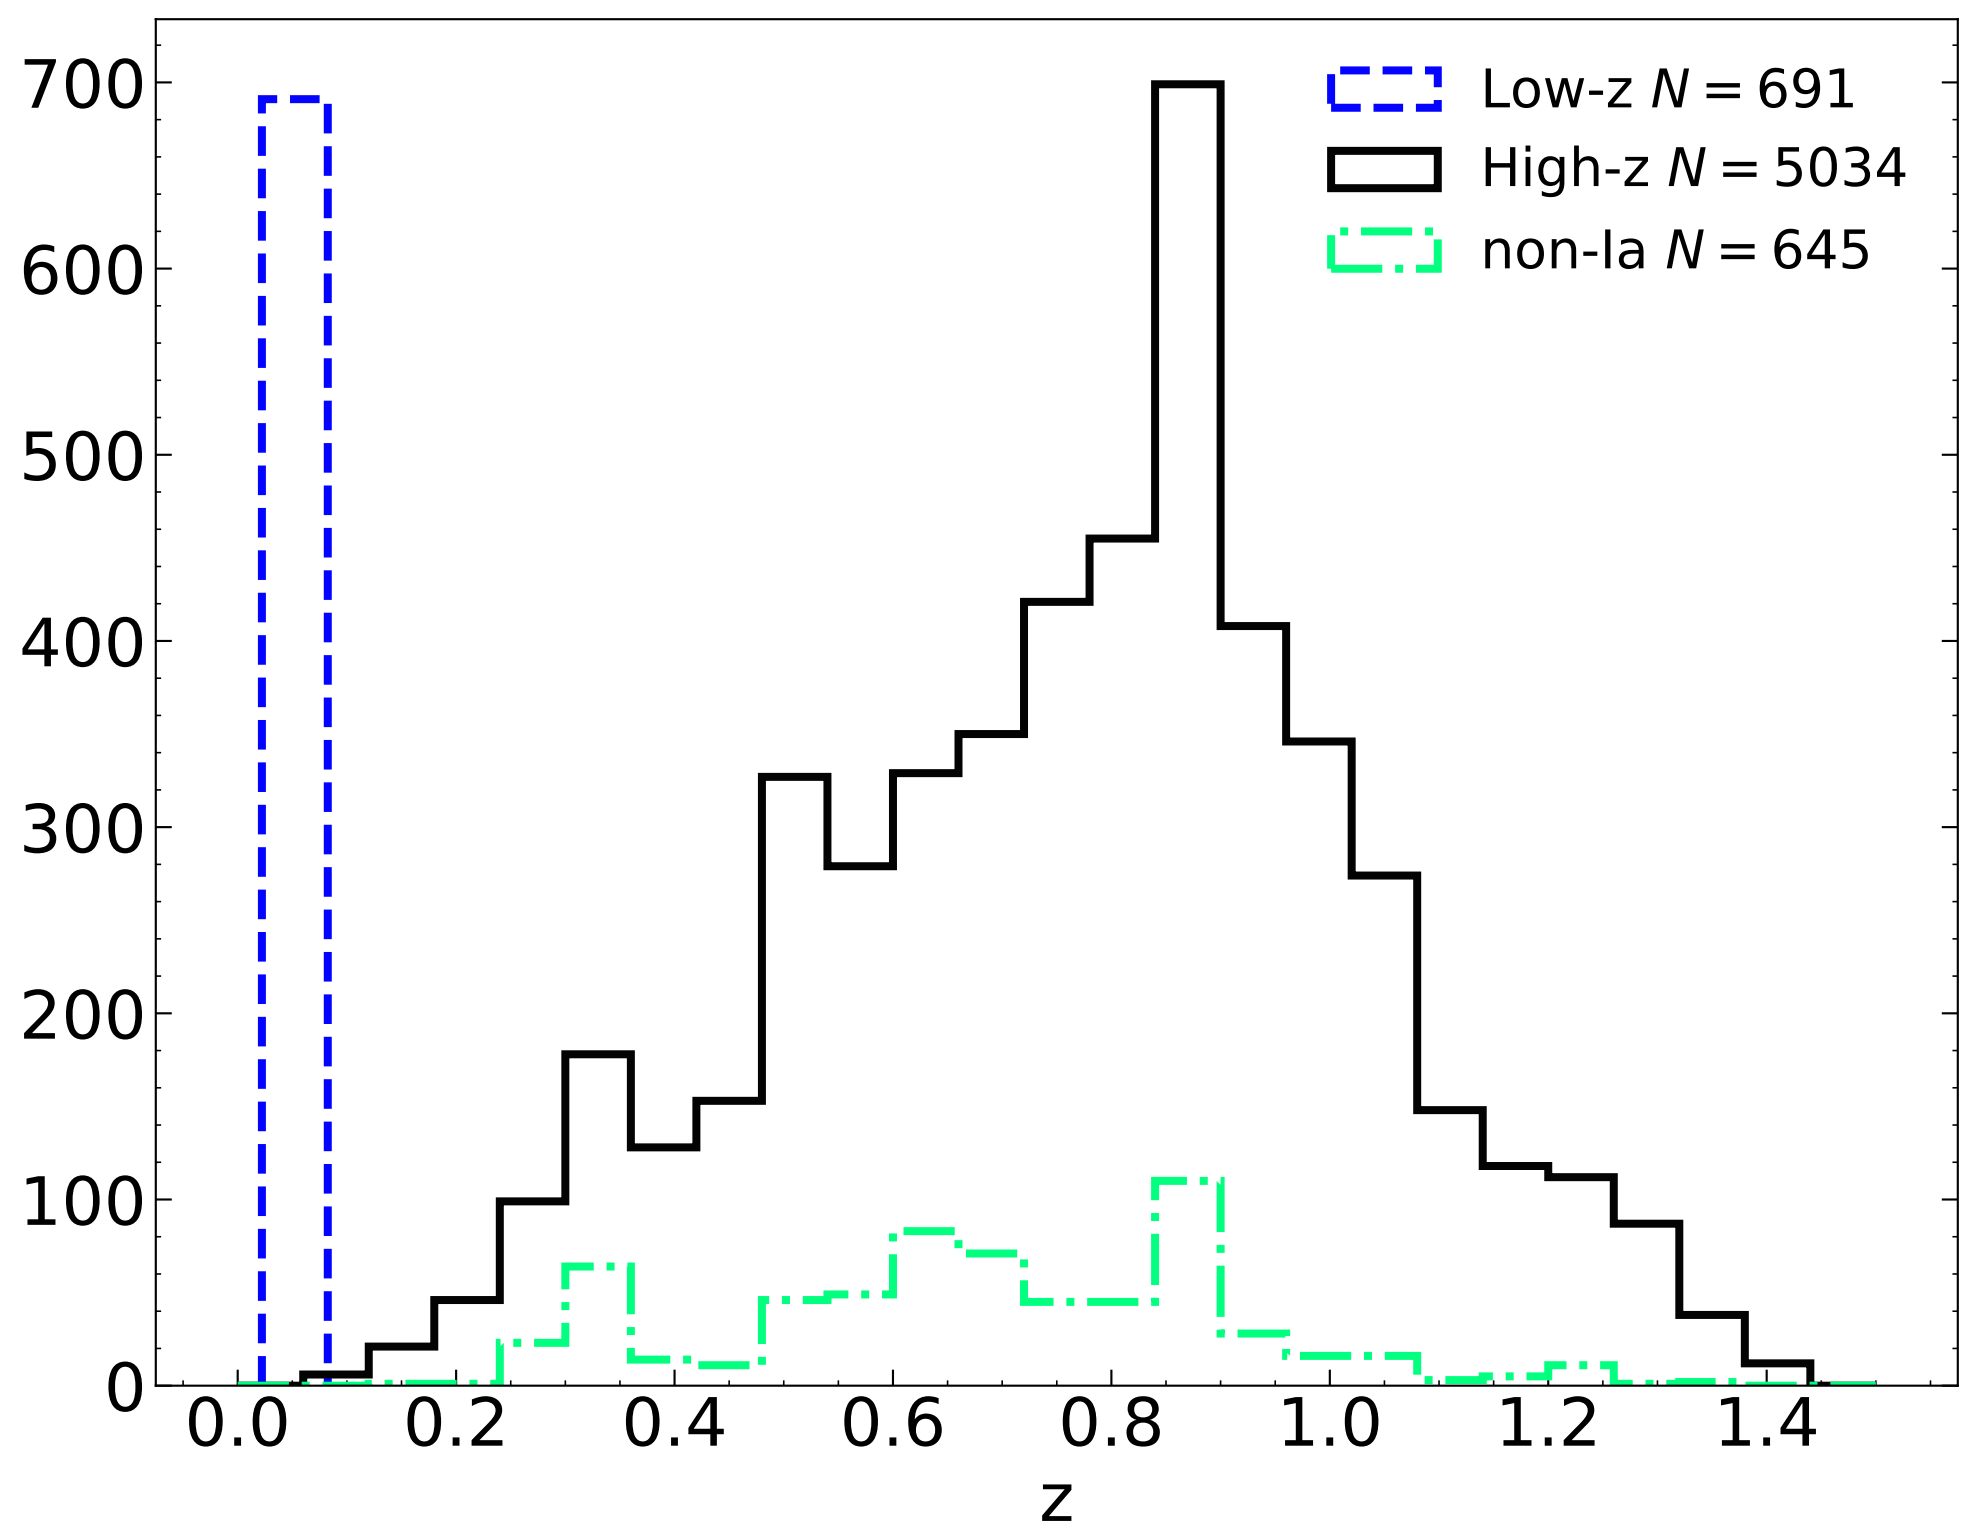

Supplement: Supplementary file 16 [file z_dist.pdf › Plot/z_dist.pdf]
